# Supplementary material
Source: Springer Nature journal article supplement (https://www.springermedizin.de/resource/supplementary/12905_2012_322_MOESM1_ESM.pdf/9518454)

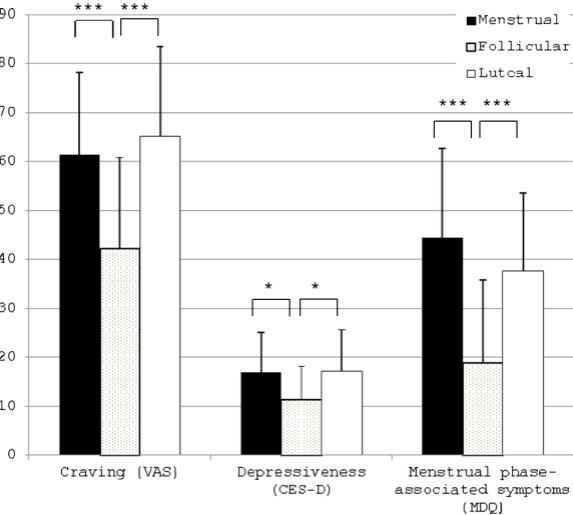

\*\*\* $P < 0.001$  \* $P < 0.05$

Supplement: MOESM1 [file 9518454]
